# Regime shifts in a phage-bacterial ecosystem and strategies for its control

Sergei Maslov,<sup>a</sup> Kim Sneppen<sup>b,\*</sup>

University of Illinois at Urbana-Champaign, Department of Bioengineering, and Carl R. Woese Institute for Genomic Biology, Urbana, IL 61801, USA<sup>a</sup>; University of Copenhagen, Center for Models of Life, Niels Bohr Institute, 2100 Copenhagen, Denmark<sup>b</sup>

**ABSTRACT** The competition between bacteria often involves both nutrients and phage predators and may give rise to abrupt regime shifts between the alternative stable states characterized by different species compositions. While such transitions have been previously studied in the context of competition for nutrients, the case of phage-induced bistability between competing bacterial species has not been considered yet. Here we demonstrate a possibility of regime shifts in well-mixed phage-bacterial ecosystems. In one of the bistable states the fast-growing bacteria competitively exclude the slow-growing ones by depleting their common nutrient. Conversely, in the second state the slow-growing bacteria with a large burst size generate such a large phage population that the other species cannot survive. This type of bistability can be realized as the competition between a strain of bacteria protected from phage by abortive infection and another strain with partial resistance to phage. It is often desirable to reliably control the state of microbial ecosystems, yet bistability significantly complicates this task. We discuss successes and limitations of one control strategy in which one adds short pulses to populations of individual species. Our study proposes a new type of phage therapy, where introduction of the phage is supplemented by addition of a partially resistant host bacteria.

**IMPORTANCE** Phage-microbial communities play an important role in human health as well as natural and industrial environments. Here we show that these communities can assume several alternative species compositions separated by abrupt regime shifts. Our model predicts these regime shifts in the competition between bacterial strains protected by two different phage defense mechanisms: abortive infection/CRISPR and partial resistance. The history dependence caused by regime shifts greatly complicates the task of manipulation and control of a community. We propose and study a successful control strategy via short population pulses aimed at inducing the desired regime shifts. In particular, we predict that a fast-growing pathogen could be eliminated by a combination of its phage and a slower-growing susceptible host.

**KEYWORDS:** keyword 1, keyword 2, keyword 3.

Please read the [Instructions to Authors](#) carefully, or browse the [FAQs](#) for further details.

## INTRODUCTION

Diverse ecosystems are known to be capable of regime shifts in which they abruptly and irreversibly switch between two mutually exclusive stable states (1). Such regime shifts have been extensively studied in both macroscopic and microbial ecosystems (1) and shown to be hysteretic and history-dependent. In microbial ecosystems (2) these

Compiled October 8, 2019

This is a draft manuscript, pre-submission

Address correspondence to [sneppen@nbi.ku.dk](mailto:sneppen@nbi.ku.dk).

† University of Copenhagen, Center for Models of Life, Niels Bohr Institute, 2100 Copenhagen, Denmark

S.M, K.S. contributed equally to this work.

Maslov et al.

transitions are known to be possible when a bacterial species directly produces some metabolic waste products or antibiotics (3) that inhibit the growth of other bacteria. They may also occur when bacterial species compete for several food sources, which they use either in different stoichiometric ratios (4) or in different preferential orders (5). Here we explore a new type of regime shifts caused by interactions between bacteria and phages. Bacteriophages have long been known to increase bacterial diversity, especially in aquatic environments (6, 7). However, their potential to create multiple stable states with distinct bacterial species compositions so far has not been recognized. Here we illustrate a possibility of such alternative stable states and regime shifts using a computational model in which two bacterial species compete for the same food source, and are simultaneously exposed to an infection by the same virulent phage. Such dual constraints are known to abate the usual competitive exclusion (8) by allowing multiple bacterial species consuming the same nutrient to co-exist (9, 7).

Microbial communities are an important part of our natural and artificial surroundings and are also responsible for many aspects of human health. Some compositions of microbial communities may be useful for us, while other might be detrimental or even lethal. Thus we would like to reliably manipulate and control the species compositions of these systems. Here we explore several strategies aimed to control the state of phage-bacterial ecosystems via short population pulses inducing the desired regime shift.

## MODEL AND RESULTS

**Model** We study a model describing the dynamics of two microbial species with populations  $B_1$  and  $B_2$  growing on a single limiting nutrient (e.g. carbon source) with concentration  $C$  and infected by a single phage species with population  $P$ . All populations are assumed to be well-mixed in an environment constantly supplied with the limiting nutrient at a rate  $\phi$ . The dynamics of this ecosystem is given by

$$\frac{dC}{dt} = \phi - C \cdot \delta_C - C \cdot \left( \frac{\lambda_1}{Y_1} B_1 + \frac{\lambda_2}{Y_2} B_2 \right) \quad (1)$$

$$\frac{dB_1}{dt} = B_1 \cdot (\lambda_1 C - \eta_1 P - \delta_B) \quad (2)$$

$$\frac{dB_2}{dt} = B_2 \cdot (\lambda_2 C - \eta_2 P - \delta_B) \quad (3)$$

$$\frac{dP}{dt} = P \cdot (\beta_1 \eta_1 B_1 + \beta_2 \eta_2 B_2 - \delta_P) \quad (4)$$

The growth rate of each bacterial species is assumed to be proportional to the nutrient concentration  $C$  with the species  $B_1$  growing faster than the species  $B_2$ :  $\lambda_1 > \lambda_2$ . Nutrient yields of these two species are given by  $Y_1$  and  $Y_2$  respectively. Phage adsorption coefficients of two species are given by  $\eta_1$  and  $\eta_2$  and their burst sizes are  $\beta_1$  and  $\beta_2$ . The two bacterial species in our model are assumed to have the same death rate  $\delta_B$  that also includes possible contribution from dilution of their shared environment. The death/dilution rate of the phage is given by  $\delta_P$  and the nutrient is diluted at a rate  $\delta_C$ .

**Conditions for bistability and regime shifts** In what follows we explore the steady state solutions of Eqs. 1-4, - the only asymptotic dynamical behavior possible in our system. In the absence of phages, the faster growing species  $B_1$  would always eliminate the slower growing species  $B_2$  due to competitive exclusion (8). Phages in principle allow for a slow-growing species to co-exist with the fast-growing one or even to completely take over the ecosystem. In order for this to happen in high-nutrient/high-phage environments the species  $B_2$  needs to be less susceptible to phage infections than the species  $B_1$ :  $\lambda_1/\eta_1 < \lambda_2/\eta_2$ . In the extreme case, where the species  $B_2$  is fully

Regime shifts in a phage-bacteria ecosystem

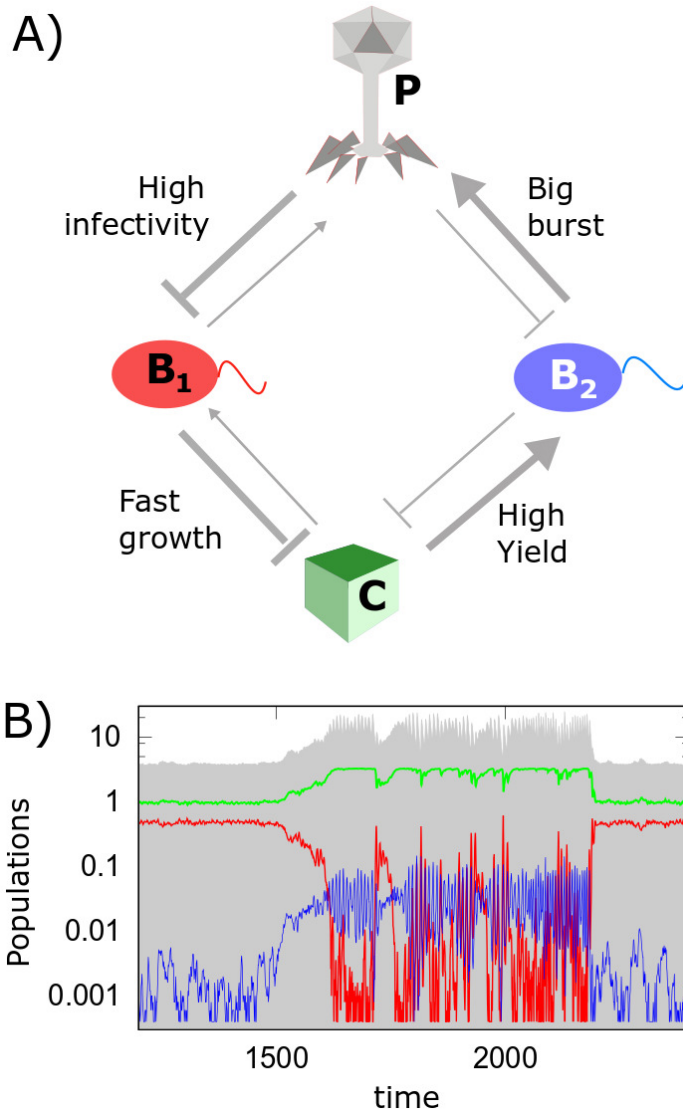

**FIG 1** Alternative stable states and regime shifts in a phage-bacterial ecosystem. **A)** The diagram of interactions between the three species and one nutrient resource in our model: the fast-growing (red,  $B_1$ ) and the slow-growing (blue,  $B_2$ ) bacterial species are limited by the same nutrient  $C$  and infected by the same phage  $P$ . The slow-growing bacteria are more protected from infections by phage, but, if infected, they generate a larger burst size. The negative effective interaction from  $B_1$  to  $B_2$  is mediated via the nutrient, while that from  $B_2$  to  $B_1$  - via the phage. **B)** A representative stochastic simulation of the model. Note the abrupt and large regime shifts of the ecosystem between two alternative stable states dominated by bacteria  $B_1$  and  $B_2$  correspondingly. All populations are always maintained above a very low level  $4 \times 10^{-4}$  provided by a weak influx of species to the ecosystem. Both phage and nutrient concentrations experience a discontinuous shift up if the ecosystem suddenly flips from the  $B_1$ -dominated state to the  $B_2$ -dominated one and down in the opposite case. The model parameters are  $\lambda_1 = 1$ ,  $\lambda_2 = 0.8$ ,  $Y_1 = Y_2 = 1$ ,  $\eta_1 = 0.20$ ,  $\eta_2 = 0.15$ ,  $\beta_1 = 2$ ,  $\beta_2 = 40$ ,  $\delta_C = \delta_B = \delta_P = 0.2$  and  $\phi = 0.66$ .

Maslov et al.

87 resistant to the phage ( $\eta_2 = 0$ ), the co-existence between these bacterial species has  
88 been previously identified and computationally studied (9, 7, 10).

89 Here we introduce and study another regime of a phage-bacterial ecosystem in  
90 which two bacterial species could mutually exclude each other. This falls under the  
91 category of discontinuous and abrupt regime shifts between alternative stable states in  
92 microbial ecosystems (see Ref. (2) for a review), which have been previously modelled  
93 in the context of competition for nutrients (5, 4) and without phages. In order for a  
94 phage-bacterial ecosystem to be in principle capable of bistability, the slow-growing  
95 bacterial species needs to produce disproportionately more phages per each unit  
96 of consumed nutrient than the fast-growing one:  $Y_2\beta_2 > Y_1\beta_1$ . As we show in the  
97 Supplementary Materials, the bistability requires the following three inequalities to be  
98 satisfied:

$$99 \quad \lambda_1 > \lambda_2 \quad (5)$$

$$100 \quad \frac{\lambda_1}{\eta_1} < \frac{\lambda_2}{\eta_2} \quad (6)$$

$$101 \quad \frac{\lambda_1}{Y_1\beta_1\eta_1} > \frac{\lambda_2}{Y_2\beta_2\eta_2} \quad (7)$$

102 Figure ??A illustrates the basic mechanisms responsible for bistability and regime  
103 shifts in our ecosystem. The thickness of each arrow scales with the relative strength  
104 of the interaction between the nodes it connects. Thus the width of the arrow pointing  
105 from the nutrient to the bacterial species  $B_i$  reflects its growth rate  $\lambda_i$ , while that of the  
106 arrow pointing in the opposite direction - the rate  $\lambda_i/Y_i$  at which this bacterial species  
107 depletes the nutrient. Similarly, the width of the arrow pointing from the phage to the  
108 bacterial species  $B_i$  reflects its adsorption coefficient  $\eta_i$ , while that of the arrow going  
109 in the opposite direction - the rate  $\beta_i\eta_i$  at which this bacterial species generates new  
110 phages.

111 Figure ??B shows a stochastic simulation of our model with parameters  $\lambda_1 = 1$ ,  
112  $\lambda_2 = 0.8$ ,  $Y_1 = Y_2 = 1$ ,  $\eta_1 = 0.20$ ,  $\eta_2 = 0.15$ ,  $\beta_1 = 2$ ,  $\beta_2 = 40$ ,  $\delta_C = \delta_B = \delta_C = 0.2$  and  $\phi = 0.66$   
113 (see Methods for details). In our simulations we do not allow the population of either of  
114 three species ( $B_1$ ,  $B_2$ , and  $P$ ) to fall below a very small value  $4 \times 10^{-4}$ . This is equivalent  
115 to keeping a constant but weak influx of these species to the ecosystem. As a result,  
116 each species would start growing as soon as ecosystem's internal parameters would  
117 make its net growth rate positive.

118 Random fluctuations in population sizes of bacteria and phages could trigger  
119 spontaneous regime shifts between two alternative stable states of the ecosystem  
120 visible in Figure ??B. One of these states is dominated by the fast growing bacterial  
121 species  $B_1$ . It suppresses the slow-growing species  $B_2$  by the virtue of competitive  
122 exclusion via their shared nutrient. In the second stable state the slow-growing species  
123  $B_2$  with a large burst size  $\beta_2$ , generates such a high population of phages that they  
124 completely eliminate the fast-growing species  $B_1$ , which is relatively more susceptible  
125 to phage infections. This steady state also has a larger nutrient concentration due to a  
126 slower rate of its depletion by the species  $B_2$ .

127 **History dependence of the ecosystem state** When Eqs. (5-7) are satisfied, the  
128 bistability is possible only in a certain intermediate range of the nutrient supply rate.  
129 Fig. 2A-D shows the changes in, respectively, steady state values of  $P$ ,  $B_1$ ,  $B_2$  and  
130  $C$  when the nutrient supply rate  $\phi$  is slowly changed first up from 0 to 1 and then  
131 down to 0 again. For very low nutrient supply rates  $\phi < 0.04$  neither bacteria nor  
132 phages can survive and the system stays abiotic  $B_1 = B_2 = P = 0$ . The fast-growing  
133 bacteria  $B_1$  first appears for  $\phi \geq 0.04$  and prevents the appearance of the slow-growing

Regime shifts in a phage-bacteria ecosystem

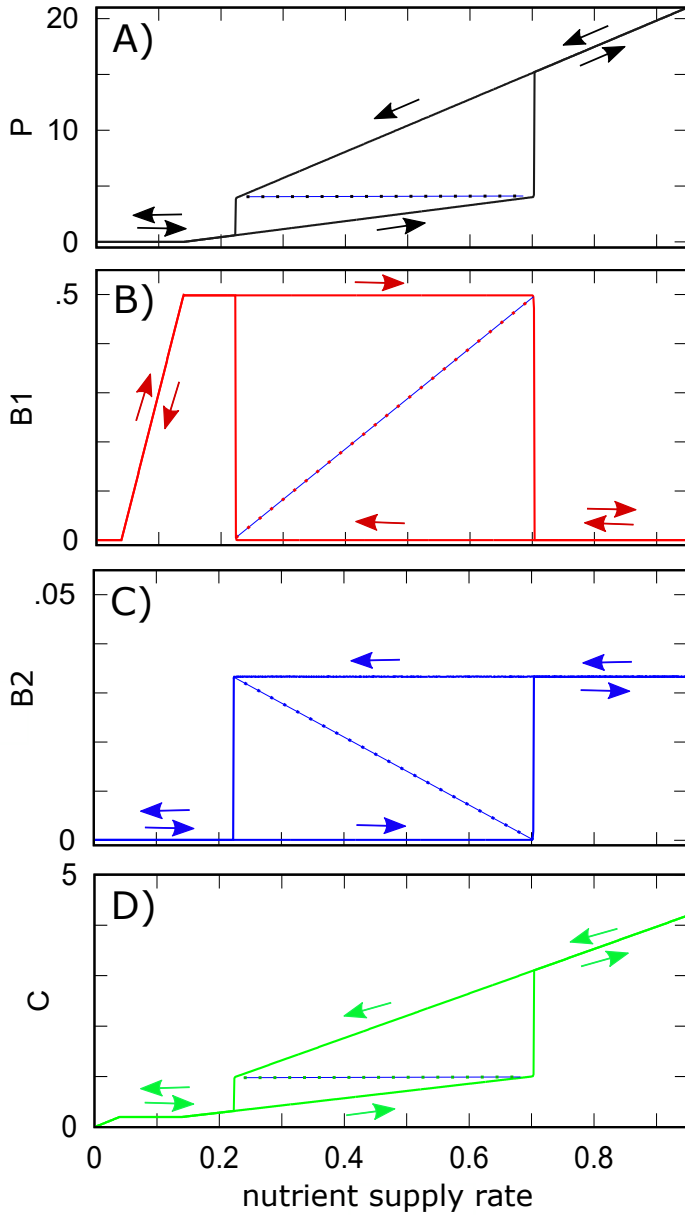

**FIG 2** Hysteresis loops in populations of phage  $P$  (black), fast-growing bacteria  $B_1$  (red), slow-growing bacteria  $B_2$  (blue) and nutrient concentration  $C$  (green) as the nutrient supply rate  $\phi$  (x-axis) is changed first up from 0 to 1 and then down to 0. Note two sudden discontinuous transitions (regime shifts) at both ends of the hysteresis loop. The dashed lines mark populations in the dynamically unstable state separating two alternative stable states. Parameters of the model are the same as in Fig. 1, except for a varying nutrient supply rate  $\phi$  (x-axis) and the absence of stochastic fluctuations.

Maslov et al.

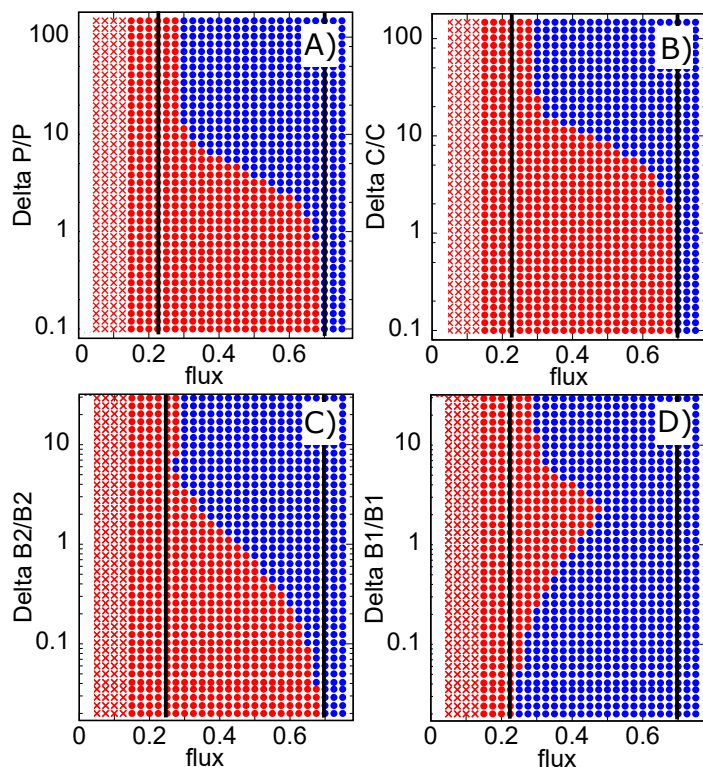

**FIG 3** Control of the ecosystem by a pulse in phage population  $P$  (panel A), resource concentration  $C$  (panel B), bacterial populations  $B_2$  (panel C), or  $B_1$  (panel D). Red symbols mark the  $B_1$ -dominated state, while blue symbols - the  $B_2$ -dominated state. In the region marked with red crosses phages cannot exist:  $P = 0$ . The  $x$ -axis is the nutrient supply rate  $\phi$  with the bi-stable region confined between two black solid lines. The  $y$ -axis is the magnitude of the pulse normalized by the population/concentration of the target stable state, that is to say, by that of the  $B_2$ -dominated state in panels A-C and of the  $B_1$ -dominated state in panel D. For nutrient supply rates  $0.27 < \phi < 0.7$  the  $B_1$ -dominated state (red) can be switched to the  $B_2$ -dominated state (red) by adding a sufficiently large pulse of phage  $P$  (panel A), nutrient  $C$  (panel B), or bacteria  $B_2$  (panel C). Conversely, for  $0.23 < \phi < 0.46$  the  $B_2$ -dominated state (blue) can be switched to the  $B_1$ -dominated state (red) by adding a sufficiently large pulse of bacteria  $B_1$  (panel D).

134 species due to competitive exclusion. As the nutrient supply rate is increased above  
 135 0.14, the population of the phage  $P$  becomes sustainable and linearly increases with  $\phi$ .  
 136  $B_2$  continues to be competitively excluded until much higher rate of nutrient supply  
 137  $\phi^{(1)} = 0.70$ , at which the ecosystem undergoes a regime shift to the state dominated by  
 138  $B_2$  and excluding  $B_1$ . This alternative stable state persists all the way up the nutrient  
 139 supply rate. The growth of  $B_1$  is prevented by a high phage population to which this  
 140 species is especially susceptible. When  $\phi$  is lowered, the  $B_2$ -dominated state survives  
 141 down to the nutrient supply rate  $\phi^{(2)} = 0.23$ , which is much lower than  $\phi^{(1)} = 0.70$ . Thus  
 142 for nutrient supply rates between 0.23 and 0.70 the ecosystem is bistable and can be in  
 143 any of the two alternative stable states making upper and lower parts of the hysteresis  
 144 loops in Fig. 2A-D. Note that the population of phages and the concentration nutrients  
 145 generally change in synchrony: when  $B_1$  is dominant, both phage and nutrient levels  
 146 are low, while the dominance of  $B_2$  generates many phages which significantly lower  
 147 its population and prevent it from fully exploiting resources, thereby keeping  $C$  high.

148 **Controlling regime shifts by population pulses** Phages have recently been in-  
 149 vestigated as potential agents of control of populations of individual bacterial species  
 150 in the gut microbiome (11). However, when alternative stable states are present, the  
 151 state of an ecosystem is complicated by hysteresis and history dependence.



## Regime shifts in a phage-bacteria ecosystem

152 One may need to switch a microbial ecosystem from an undesirable/diseased state  
153 to a desirable/healthy state without perturbing the environmental parameters such  
154 as nutrient supply rate. One way to achieve such control is by adding a fixed amount  
155 of one of the species  $P$ ,  $B_1$ ,  $B_2$ , or of the nutrient  $C$  giving rise to an instantaneous  
156 increase of its current population/concentration. Such one-time addition, which we call  
157 a “population pulse”, is similar to the “impulsive control strategy” discussed in Ref. (12).  
158 Since  $P$ ,  $C$ , and  $B_2$  are all higher in the  $B_2$ -dominated state than in the  $B_1$ -dominated  
159 state, adding a population pulse of either one of them to the  $B_1$ -dominated state could,  
160 in principle, trigger a regime shift. Similarly, adding a population pulse of  $B_1$  to the  
161  $B_2$ -dominated state could result in a regime shift in the opposite direction.

162 Fig. 3 explores successes and limitations of the population pulse strategy. We  
163 found that this strategy works but only within a certain range of nutrient supply that is  
164 generally more narrow than the bistability region itself. A regime shift from the  $B_1$ - to  
165 the  $B_2$ -dominated state can be triggered across the entire bistability region. Conversely,  
166 a regime shift from the  $B_2$ - to the  $B_1$ -dominated state by adding a pulse of  $B_1$  can be  
167 made only for  $\phi$  below 0.46, which is lower than  $\phi^{(1)} = 0.7$  - the upper bound of the  
168 bistable region (the right solid line in Fig. 3). Another observation is the reentrant  
169 transition in Fig. 3D: adding too much of  $B_1$  to the  $B_2$ -dominated state may prevent  
170 the regime shift from taking place. We also note that in order to trigger a regime  
171 shift one generally needs to add a pulse that would transiently make the population  
172 of the perturbed species to exceed its steady state value in the targeted state (pulse  
173 normalized to 1 on the y-axis in Fig. 3). Indeed, a pulse changes only one out of four  
174 populations/concentrations in our ecosystem. Thus it needs to be large enough to  
175 drive the remaining three populations in the general direction of the regime shift.

176 Consider a situation where we can simultaneously perturb all three species and  
177 the nutrient and set their populations/concentrations ( $C$ ,  $B_1$ ,  $B_2$ , and  $P$ ) to any desired  
178 value. In this case, transient populations after a pulse could be made smaller than their  
179 steady state values in the target state. Indeed, to switch the state of the ecosystem, it  
180 would be sufficient to make all four populations/concentrations just a little bit closer to  
181 the target state than their values in the dynamically unstable state shown as dashed  
182 lines in Fig. 2A-D.

183 **Model with perfect abortive infection in  $B_1$**  In one of the phage defense mech-  
184 anisms called abortive infection (Abi) (13) phages enter and kill the host without pro-  
185 ducing any phage progeny. A special limit of our model is obtained when the species  
186  $B_1$  is characterized by abortive infection:  $\beta_1 = 0$ , while  $\eta_1 > 0$ . Our equations in this case  
187 predict  $\phi^{(1)} = \infty$ , which means that  $B_1$  would not disappear from the ecosystem for  
188 any nutrient supply  $\phi$ . Indeed, this species generates no phage progeny, thus it always  
189 can outcompete a small amount of the slower-growing species  $B_2$  infected by phages.  
190 However, analogous to Fig. 3A,C a sufficiently large population pulse of  $B_2$  and  $P$  can  
191 get established in the system and eliminate  $B_1$ . This could happen for  $\phi > \phi^{(2)}$ .

## 192 DISCUSSION

193 We introduced a mathematical model of regime shifts in phage-bacterial ecosystems.  
194 The alternative stable states in our model are populated by different bacterial species  
195 mutually excluding each other. The negative interactions between these species are  
196 mediated by either their co-infecting phages or their shared nutrients. In this respect  
197 the mechanism of bistability in our model is similar to that in consumer resource  
198 models without phages (4). Indeed, the mandatory (but not sufficient) condition for  
199 bistability in either of these two models is a significant difference in stoichiometry of  
200 competing microbial species. In our model this stoichiometry is quantified by  $Y \cdot \beta$

Maslov et al.

201 - the product of nutrient yield and burst size of a given bacterial species. It can be  
202 interpreted as the conversion factor connecting the amount of nutrients used to build  
203 a single bacterial cell to the number phages it produced upon lysis. Comparison of  
204 inequalities in Eq. 6 and Eq. 7 shows that bistability is possible only when conversion  
205 factors of two bacterial species are sufficiently different from each other:  $Y_2 \cdot \beta_2 > Y_1 \cdot \beta_1$ .

206 Similarly, multistability studied in Refs. (14, 4) requires species competing for two  
207 types of essential resources (e.g. C and N) to have different C:N stoichiometries.

208 Regime shifts and multistability are known to occur when competition between  
209 species in principle allows for their co-existence, while the differences in stoichiometry  
210 make such coexistence dynamically unstable (14, 4). This is also true in our model,  
211 where bistability between species  $B_1$  and  $B_2$  is possible whenever their co-existence  
212 is dynamically unstable. Conversely, a dynamically stable co-existence of  $B_1$  and  $B_2$  is  
213 possible whenever inequalities given by Eqs 5-6 are satisfied, while that in the Eq. 7  
214 changes the direction to  $\lambda_1/(Y_1\beta_1\eta_1) < \lambda_2/(Y_2\beta_2\eta_2)$ .

215 Our model predicts that regime shifts in phage-microbial ecosystems can be a  
216 consequence of differences in species' yields  $Y_2 > Y_1$  rather than their burst sizes. A  
217 negative correlation between species' growth rate and its yield known as rate-yield  
218 trade-off is widely known (15). According to this correlation slower growing species  
219 tend to have higher yields thereby facilitating bistability in our model.

220 A general case of predator-prey food webs with multiple trophic levels has been  
221 considered in Ref. (16, 17). For certain combinations of parameters one can prove that  
222 the steady state of dynamical equations describing such ecosystems is unique and thus  
223 multistability is impossible. This proof, based on the Lyapunov function proposed in  
224 Ref. (18), requires the food web to have identical stoichiometry products (like  $Y_i\beta_i$  in our  
225 model) for all paths connecting the same pair of species. Here we extend this study by  
226 showing that if the difference in stoichiometries of two such paths is sufficiently large,  
227 multistability could in principle emerge. Thus, it is tempting to extend our mechanism  
228 for multistability up from microscopic phage-bacterial ecosystems to macroscopic  
229 predator-prey food webs. In order for macroscopic food webs to be multistable, the  
230 biomass conversion ratio between two successive trophic levels has to deviate widely  
231 from its typical value of about 10% (19, 20) and be sufficiently different for different  
232 species in the same trophic level. Indeed, one could always choose to measure the  
233 population of each species in units of its biomass per unit area. These units would  
234 rescale absolute values of competition parameters such as  $\lambda$  and  $\eta$ . In these units  
235 stoichiometric coefficients  $Y$  and  $\beta$  are given by the efficiency (0%-100%) of biomass  
236 conversion between two consecutive trophic levels. Multistability requires sufficient  
237 differences in biomass conversion factors along paths between species in different  
238 trophic levels. For example, in our model the nutrient, which can be thought to occupy  
239 the trophic level 0 is connected to the phage species (trophic level 2) via paths going  
240 through two different bacterial species (intermediate trophic level 1). Furthermore,  
241 the number of species in intermediate trophic levels of these paths has to be odd.  
242 Given that the overall number of trophic levels rarely exceeds 4, the case of a single  
243 intermediate trophic level considered in this study represents the most biologically  
244 plausible scenario.

245 The ecosystem used in our study is very simple: it has low species diversity and a  
246 single growth-limiting nutrient. This simplicity allowed us to quantitatively understand  
247 the principal mechanisms giving rise to bistability. More complex ecosystems with a  
248 larger number of species and multiple nutrients are expected to have qualitatively  
249 similar properties. They also could have a much more complicated phase diagram  
250 in the space of nutrient supply rates. Hence multistability with more than two stable



## Regime shifts in a phage-bacteria ecosystem

251 states could be realized in some regions of this space (See Ref. (4) for this type  
252 of multistability in consumer resource models). Another limitation of our model is  
253 that it ignores the possibility of rapid evolution of bacterial strains competing with  
254 phages. Such red queen dynamics often generates phage-resistant bacterial strains.  
255 The appearance of a phage-resistant variant of  $B_1$  would modify the behavior of our  
256 ecosystem for very high nutrient supply, but might not affect bistability between  $B_1$  and  
257  $B_2$  for intermediate nutrient supply studied above. This depends on the magnitude of  
258 the growth deficiency of the resistant mutant. A delicate interplay between multiple  
259 strains and species could be understood by visualizing them all in Fig. 4A, where a  
260 phage-resistant strain would be shown as a vertical line.

261 It is instructive to compare the mechanisms of bistability in our model to two  
262 previously described bistable systems involving phages and bacteria. One example of  
263 alternative stable states in a phage-microbial ecosystem has been described in Ref. (21).  
264 Unlike in our model, where regime shifts change the composition of bacterial species,  
265 the ecosystem modeled in Ref. (21) switches between the states with and without  
266 phages. The main feature responsible for this switching behaviour is a decrease of  
267 adsorption coefficient of the bacterial host when nutrients become scarce. Similar to  
268 regime shifts in our ecosystem, the feedback between the nutrient concentration and  
269 the abundance of phages is at the core of this bistable behavior.

270 Perhaps the most celebrated example of a bistable system is the genetic switch  
271 operating inside a bacterial host of a temperate phage (22, 23). In a host of the  
272 prophage  $\lambda$  there is an intracellular competition between the dormant, lysogenic state  
273 dominated by the repressor protein C1 (24), and the virulent, lytic state dominated  
274 by the protein Cro (25). When Cro wins, it leads to production of a large number of  
275 phages, akin to the species  $B_2$  in our microbial ecosystem. High nutrient concentration  
276 in the environment typically favors the lytic state of the  $\lambda$ -host (26). Such lytic state is  
277 analogous to the  $B_2$ -dominated regime in our ecosystem, also favored by high  $C$ . In  
278 this sense our ecosystem can be in the “dormant state” producing few phages when it  
279 is dominated by  $B_1$ . When this state is exposed to a strong pulse of  $P$ ,  $C$ , or  $B_2$  it can  
280 switch to the “lytic state” dominated by  $B_2$  and producing many phages (see Fig. 3).

281 One realistic implementation of bistability predicted by our model is in a phage-  
282 microbial ecosystem consisting of a bacterial strain protected against phages by the  
283 abortive infection (Abi) mechanism ( $B_1$ ) and a partially-resistant strain ( $B_2$ ) co-infected  
284 by the same phage. Hosts with abortive infection allow phages to enter and kill them  
285 without producing a noticeable phage progeny (13). An example of the Abi defense  
286 is provided by certain types of CRISPR defense (27, 28, 29), where phages kill most of  
287 infected hosts but have zero or small burst size. In contrast to Abi- or CRISPR-protected  
288 bacteria, partially resistant strains may arise due to a mutation in the receptor protein  
289 which reduces both the growth rate (30) and the phage adsorption but has little effect  
290 on the burst size. Thus regime shifts may naturally occur as a consequence of diverse  
291 phage defence mechanisms in microbial ecosystems (31).

292 A potential application of our system is in a new type of phage therapy in which  
293 phages targeting the pathogenic species ( $B_1$ ) are introduced together with carefully  
294 selected non-pathogenic species ( $B_2$ ) infected by the same phage. This therapy effec-  
295 tively combining two population pulses shown in panels A and C of Fig. 3 would lead to  
296 a more efficient and permanent elimination of the fast-growing pathogen ( $B_1$ ). One  
297 of the advantages of this approach is that phages would be continually present in the  
298 former patient thereby preventing reentry of pathogenic bacteria. The strategy could  
299 be made even more favourable if the bacteria added together with phages would use  
300 a nutrient other than  $C$  rendering it not vulnerable to nutrient competition from the

Maslov et al.

301 pathogen.

## 302 METHODS

303 **Simulations** The paper investigates the dynamics of a model defined by Eqs. (1-4),  
304 built on assumptions of mass action kinetics in a well-mixed system with an adjustable  
305 nutrient supply rate (32). We performed both deterministic and stochastic simulations  
306 of this model.

307 In stochastic simulations shown in Fig. 1B we use the Gillespie algorithm with step  
308 size of 0.0002 and rates defined for each of the 9 basic processes in Eqs 1-4: nutrient  
309 introduction and dilution events,  $B_1$  and  $B_2$  replication events, phage infection events  
310 separately in  $B_1$  and in  $B_2$ , and combined death/decay/dilution events in each of the  
311 two bacteria and one phage species. Notice that a single phage infection event reduces  
312 the bacterial population by the step size equal to 0.0002, but increases the phage  
313 population by  $\beta \cdot 0.0002$ . A large value of the burst size  $\beta_2 = 40$  justifies a small step size  
314 used in our simulations.

315 Deterministic simulations shown in Fig. 2 solve the dynamics given by Eqs. (1-  
316 4). At each value of nutrient supply rate  $\phi$  we integrate the equations for 1000 time  
317 units to eliminate transients. We then increase the nutrient supply rate in increments  
318  $\Delta\phi = 0.01$ . We use the steady state populations/concentrations obtained at  $\phi$  as  
319 starting populations/concentrations for simulations at  $\phi + \Delta\phi$ .

320 Each blue or red dot in Fig. 3 was obtained by starting the system in one of  
321 the stable states, and subsequently changing one of the variables ( $P$ ,  $C$ ,  $B_1$  or  $B_2$ ) as  
322 indicated on the y-axis. After a deterministic simulation of dynamical Eqs. (1-4) for  
323 1000 time-units, the final state is compared to each of the states possible for a given  
324 value of  $\phi$  and is marked with the corresponding color Fig. 3.

325 **Conditions for bistability** In our model it is convenient to describe the growth of a  
326 microbial species in  $(C, P)$  coordinates, characterizing respectively the nutrient and the  
327 phage concentrations in the environment. The population of a species exponentially  
328 grows for  $\lambda C - \eta P > \delta_B$ , exponentially decays for  $\lambda C - \eta P < \delta_B$ , and stays constant for  
329  $\lambda C - \eta P = \delta_B$ . The last equation defines the so-called Zero Net Growth Isocline (ZNGI)  
330 (14) of the species defined by all environmental parameters where the population of  
331 this species could be in a steady state. Everywhere in the region of the  $(C, P)$ -plane  
332 located to the right and below of species ZNGI (high  $C$  and small  $P$ ) its population  
333 exponentially grows, while in the region to the left and above its ZNGI (low  $C$  and large  
334  $P$ ) it exponentially decays.

335 Red and blue straight lines in Fig. 4A correspond to the Zero Net Growth Isoclines  
336 (ZNGI) of, correspondingly, the fast- and the slow-growing bacterial species in our  
337 model. They intersect at the point  $(C^*, P^*)$  given by

$$338 \quad C^* = \frac{\delta_B \cdot (\eta_1 - \eta_2)}{\lambda_1 \lambda_2 \cdot \left(\frac{\eta_1}{\lambda_1} - \frac{\eta_2}{\lambda_2}\right)} \quad (8)$$

$$339 \quad P^* = \frac{\delta_B \cdot (\lambda_1 - \lambda_2)}{\lambda_1 \lambda_2 \cdot \left(\frac{\eta_1}{\lambda_1} - \frac{\eta_2}{\lambda_2}\right)} \quad (9)$$

340 The intersection point correspond to the only set of environmental parameters at  
341 which these two species can potentially coexist with each other.

342 The lower part of the species 1 ZNGI (the solid part of the red line) extending from  
343  $P = 0$  and up to the intersection point at  $P^*$  and the upper part of the species 2 ZNGI  
344 above  $P^*$  (the solid part of the blue line) have a special property that the other species  
345 would not be able to grow in this environment. Hence, the union of these two halves  
346 of ZNGIs corresponds to uninvadable states of the ecosystem, which are the main

Regime shifts in a phage-bacteria ecosystem

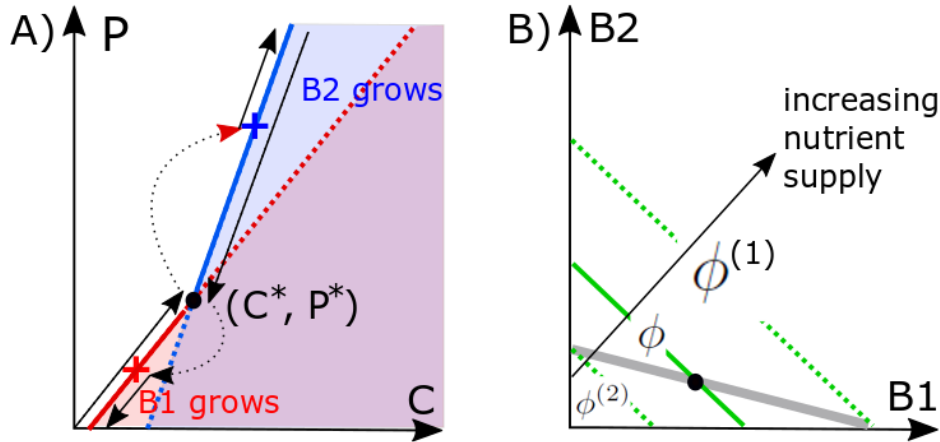

**FIG 4** Geometric solution of the steady state of the ecosystem. **A)** Steady state  $C$  and  $P$  are from solving Eqs. (2-3). When both bacteria  $B_1$  and  $B_2$  are present the system can only be at the intersection  $(C^*, P^*)$ . In our case this state is dynamically unstable. As  $\phi$  increases, the environmental parameters  $(C, P)$  follow the solid red line up to the black dot, then discontinuously jumps to the blue cross and continues up along the solid blue line. When  $\phi$  subsequently decreases in the hysteresis loop shown in Fig. 2, the  $(C, P)$  follow the solid blue line down to the black dot, discontinuously jumps to the red cross and continues down along the solid red line. This trajectory is shown in black lines with arrows. **B)** The geometric solution for coexisting bacterial populations is given by the intersection of the grey line, where the phage population is at the steady state  $P = P^*$  (Eq. 14), and the green line, where the nutrient concentration is at the steady state  $C = C^*$  (Eq. 15). The green line shifts up as the nutrient supply  $\phi$  is increased. Bacterial populations  $B_1$  ( $B_2$ ) disappear at the boundaries  $\phi^{(1)}$  ( $\phi^{(2)}$ ) of the bistability region  $\phi^{(2)} < \phi < \phi^{(1)}$ . Here we show an example in which the steady state  $C^*, P^*$  is dynamically unstable giving rise to bistability. However, if the grey line has a steeper slope than the green line, the bistability is replaced by the region  $(\phi^{(1)} < \phi < \phi^{(2)})$  of stable coexistence of  $B_1$  and  $B_2$ .

focus of this study. The exact position of the environmental parameters on the  $(C, P)$  plane is determined by the supply rate  $\phi$  of the limiting nutrient to the ecosystem. For  $\phi < \delta_C \delta_B / \lambda_1$  there is not enough nutrient to support the growth of any species and the environment remains abiotic. Hence the first transition happens at

$$\phi_{B1} = \frac{\delta_C \delta_B}{\lambda_1} \quad (10)$$

For  $\phi_{B1} < \phi < \delta_C \delta_B / \lambda_1 + \delta_P \delta_B / (Y_1 \beta_1 \eta_1)$ , the species 1 is present but its biomass is not sufficient to support the survival of the phage. The phage first enters the ecosystem at

$$\phi_{P1} = \frac{\delta_C \delta_B}{\lambda_1} \cdot \left( 1 + \frac{\delta_P}{\delta_C} \cdot \frac{\lambda_1}{Y_1 \beta_1 \eta_1} \right) \quad (11)$$

For even larger nutrient supply rates:  $\phi_{P1} < \phi < \phi^{(1)} = C^* \delta_P \left( \frac{\lambda_1}{Y_1 \beta_1 \eta_1} + \frac{\delta_C}{\delta_P} \right)$  the ecosystem contains only the species 1 and the phage. The crucial parameters of the phage-bacterial ecosystem considered in our model are

$$\phi^{(1)} = C^* \delta_P \left( \frac{\lambda_1}{Y_1 \beta_1 \eta_1} + \frac{\delta_C}{\delta_P} \right) \quad (12)$$

$$\phi^{(2)} = C^* \delta_P \left( \frac{\lambda_2}{Y_2 \beta_2 \eta_2} + \frac{\delta_C}{\delta_P} \right) \quad (13)$$

where  $C^*$  is given by the Eq. 8. For nutrient supply rates  $\phi > \phi^{(1)}$  the species 2 can in principle grow in the ecosystem give  $C$  and  $P$  shaped by the species 1. What happens

Maslov et al.

in this region crucially depends on whether  $\phi^{(1)} < \phi^{(2)}$  or  $\phi^{(1)} > \phi^{(2)}$ , with the latter case corresponding to bistability which is the main focus of this study. For pedagogical reasons, let us first consider the model where  $\phi^{(1)} < \phi^{(2)}$  and thus  $B_1$ - $B_2$  co-existence is possible. In this case both species 1 and 2 can co-exist with each other in the interval  $C^* \delta_P \left( \frac{\lambda_1}{Y_1 \beta_1 \eta_1} + \frac{\delta_C}{\delta_P} \right) = \phi^{(1)} < \phi < \phi^{(2)} = C^* \delta_P \left( \frac{\lambda_2}{Y_2 \beta_2 \eta_2} + \frac{\delta_C}{\delta_P} \right)$ . The abundances of each of the two microbial species can be geometrically determined as the intersection of two straight lines in the  $(B_1, B_2)$ -plane shown in Fig. 4B. The grey line corresponds to the steady state of the phage population  $P$  in Eq. 4 and is given by the equation

$$\beta_1 \eta_1 B_1 + \beta_2 \eta_2 B_2 = \delta_P \quad . \quad (14)$$

It must intersect with another straight line defining the steady state of the nutrient concentration  $C = C^*$  and is given by

$$\frac{\lambda_1 B_1}{Y_1} + \frac{\lambda_2 B_2}{Y_2} = \frac{\phi}{C^*} - \delta_C \quad . \quad (15)$$

These lines intersect for positive  $B_1$  and  $B_2$  when  $\phi^{(1)} < \phi < \phi^{(2)}$ .

In the opposite case, where  $\phi^{(1)} > \phi^{(2)}$ , the system is capable of bistability for nutrient supply rates  $\phi^{(2)} < \phi < \phi^{(1)}$ . To understand this it is useful to follow the trajectory of environmental parameters  $(C, P)$  as  $\phi$  is gradually increased. For  $\phi_{P1} < \phi < \phi^{(1)}$  the environmental parameters follow the ZNGI of the fast growing species 1 (the red line in Fig. 4A below the intersection with the blue line). Immediately above the intersection point  $(C^*, P^*)$ , realized for nutrient supply rate slightly larger than  $\phi^{(1)}$ , the ecosystem becomes invadable by the species 2. However, for this species the intersection point  $(C^*, P^*)$  corresponds to a lower value of nutrient supply  $\phi^{(2)} < \phi^{(1)}$ . Hence after a brief transient period the environmental parameters  $(C, P)$  of our ecosystems move to the position marked with the blue cross in Fig. 4A. As  $\phi$  continues to increase above  $\phi^{(1)}$ , the environmental parameters follow the ZNGI of the species 2 (the blue line to the right of the blue cross in Fig. 4A).

If at some point one starts decreasing  $\phi$ , the species 2 will persist down to  $\phi^{(2)}$  at which the environmental parameters are again at the coexistence point  $(C^*, P^*)$ . For slightly lower  $\phi$  the environmental parameters will discontinuously jump to the point marked with the red cross on the ZNGI of the species 1. For even lower nutrient supply rates they will continue to follow the ZNGI of the species 1 to the left and below of the red cross. Hence, our environment is bistable in the interval of two ZNGIs between the red and blue crosses. The lower red part of this interval is reachable only when  $\phi$  is increased from a low value below  $\phi^{(2)}$ , while the upper blue part - when  $\phi$  is decreased from a high value above  $\phi^{(1)}$ .

Above we assumed that phages can survive for  $\phi = \phi^{(2)}$  in the ecosystem dominated by the species 1 instead of species 2. This requires  $C^* \delta_P \left( \frac{\lambda_2}{Y_2 \beta_2 \eta_2} + \frac{\delta_C}{\delta_P} \right) = \phi^{(2)} > \phi_{P1} = \frac{\delta_C \delta_B}{\lambda_1} \cdot \left( 1 + \frac{\delta_P}{\delta_C} \cdot \frac{\lambda_1}{Y_1 \beta_1 \eta_1} \right)$ , which can be rewritten as

$$\frac{\eta_1 - \eta_2}{\lambda_1 \eta_1 - \eta_2} > \frac{\frac{\lambda_1}{Y_1 \beta_1 \eta_1} + \frac{\delta_C}{\delta_P}}{\frac{\lambda_2}{Y_2 \beta_2 \eta_2} + \frac{\delta_C}{\delta_P}} \quad . \quad (16)$$

In the opposite limit of this inequality and for nutrient supply rates satisfying  $\phi^{(2)} < \phi < \phi_{P1}$  the phages will be absent in one of the two alternative stable states (dominated by the species 1) but present in another one (dominated by the species 2).

The scenario illustrated in Fig. 2 corresponds to  $\phi_{P1} < \phi^{(2)} < \phi^{(1)}$ . In this case, the

Regime shifts in a phage-bacteria ecosystem

abundances in the steady state S dominated by the fast growing species 1 are given by

$$B_1^{(F)} = \frac{\delta}{\beta_1 \eta_1} \quad (17)$$

$$B_2^{(F)} = 0 \quad (18)$$

$$C^{(F)} = \frac{\phi}{\delta + \lambda_1 B_1^{(F)} / Y_1} \quad (19)$$

$$P^{(F)} = \frac{\lambda_1 C^{(F)} - \delta}{\eta_1} \quad (20)$$

The abundances in the alternative stable state F dominated by the slow growing species

2

$$B_1^{(S)} = 0 \quad (21)$$

$$B_2^{(S)} = \frac{\delta}{\beta_1 \eta_1} \quad (22)$$

$$C^{(S)} = \frac{\phi}{\delta + \lambda_2 B_2^{(S)} / Y_2} \quad (23)$$

$$P^{(S)} = \frac{\lambda_2 C^{(S)} - \delta}{\eta_2} \quad (24)$$

in the state dominated by the species 2.

In the regime where  $\phi_{P1} < \phi^{(2)} < \phi^{(1)}$  and for nutrient supply rates in the bistable window  $\phi^{(2)} < \phi < \phi^{(1)}$ , the ecosystem also has a dynamically unstable steady state in which both bacterial species co-exists with each other and have the following abundances:

$$B_1^{(U)} = \frac{\delta}{\beta_1 \eta_1} \cdot \frac{\phi - \phi^{(2)}}{\phi^{(1)} - \phi^{(2)}} \quad (25)$$

$$B_2^{(U)} = \frac{\delta}{\beta_2 \eta_2} \cdot \frac{\phi^{(1)} - \phi}{\phi^{(1)} - \phi^{(2)}} \quad (26)$$

Note that in our study we consider only uninhabitable states of the ecosystem. In other words, we ignore an inhabitable steady state, where for a small value of  $\phi$  the ecosystem is populated only by the species 2, or another inhabitable steady state realized for a large value of  $\phi$ , where the ecosystem has only the species 1. These states are located on inhabitable parts of each species' ZNGI, which are to the right and below the ZNGI of the other species in Fig. 4A. Indeed, in these regions an arbitrary small inoculum of the invading species would exponentially grow and thereby disrupt the steady state of the ecosystem moving the environmental variables to a new point on the  $(C, P)$  plane.

**Parameters used in our numerical simulations** Both in stochastic and deterministic simulations of our model shown in Figures (1-3) we used the following parameters:

$$\lambda_1 = 1.0; \quad \lambda_2 = 0.8 \quad (27)$$

$$Y_1 = 1; \quad Y_2 = 1 \quad (28)$$

$$\eta_1 = 0.2; \quad \eta_2 = 0.15 \quad (29)$$

$$\beta_1 = 2; \quad \beta_2 = 40 \quad (30)$$

$$\delta_C = \delta_B = \delta_P = 0.2 \quad (31)$$

For these parameters the ecosystem is bistable when nutrient supply rate is between

$$\phi^{(2)} = 0.2266 \quad (32)$$

$$\phi^{(1)} = 0.7 \quad (33)$$

Maslov et al.

The bacterial abundances anywhere within this interval of nutrient supply rates are given by  $B_1^{(F)} = 0.5$ ,  $B_2^{(F)} = 0$  or  $B_1^{(S)} = 0$ ,  $B_2^{(S)} = 0.0333$  in alternative stable states dominated respectively by the fast and the slow-growing bacterial species.

The other transitions visible in Figure 2 happen at  $\phi_{B1} = 0.04$  above which the bacterial species 1 is able to survive given the dilution rate  $\delta$ , and  $\phi_{P1} = 0.14$ , above which the phage can survive in this ecosystem.

To estimate the typical values of  $C$  and  $P$  in two bistable states let us consider one example when  $\phi = 0.25$  is slightly above  $\phi_{(2)}$ . In this case the steady state concentrations of the nutrient and the phage in two alternative stable states: F and S are given by

$$C^{(F)} = 0.357; \quad C^{(S)} = 1.277 \quad (34)$$

$$P^{(F)} = 0.786; \quad P^{(S)} = 5.476 \quad (35)$$

The dynamically unstable steady state point always has  $C^* = 1$  and  $P^* = 4$ , which are located between their values in the F and S states. The bacterial abundances in an unstable state for  $\phi = 0.25$  are given by  $B_1^{(U)} = 0.0246$  and  $B_2^{(U)} = 0.0317$ . Note that the steady state abundance of the species 1 in the unstable state is much lower than its abundance  $B_1^{(F)} = 0.5$  in the stable state. That suggests why for such a low value of  $\phi$  we found it impossible to switch the ecosystem from the F state to the S state by pulses of  $C$ ,  $P$ , or  $B_2$ . Indeed, neither of these transient pulses is capable of lowering down  $B_1$  to the extra low saddle point value  $B_1^{(U)} = 0.0246$  from initial stable state value of  $B_1^{(F)} = 0.5$  without simultaneously moving the populations of other species away from the saddle point region.

The position of the crosses in Fig. 4A can be calculated as follows: at  $\phi = \phi^{(1)} = 0.7$  the species 1 sets the environmental parameters of the ecosystem exactly at the intersection point  $(C^*, P^*) = (1, 4)$  between ZNGIs of species 1 and 2. For slightly higher nutrient supply rates the species 2 eliminates the species 1 and the nutrient concentration shifts to  $C_{2x} = \frac{\phi^{(1)}}{\delta_C + \delta_P \lambda_2 / (\gamma_2 \beta_2 \eta_2)} = 3.09$ , and the phage population - to  $P_{2x} = (\lambda_2 C_{2x} - \delta_B) / \eta_2 = 15.14$ . On the way down the bacterial species 1 reenters the ecosystem slightly below  $\phi = \phi^{(2)} = 0.2266$ . When the species 1 replaces the species 2 immediately below this point the nutrient concentration shifts to  $C_{1x} = \frac{\phi^{(2)}}{\delta_C + \delta_P \lambda_1 / (\gamma_1 \beta_1 \eta_1)} = 0.3238$ , and the phage population - to  $P_{1x} = (\lambda_1 C_{1x} - \delta_B) / \eta_1 = 0.6190$ .

## ACKNOWLEDGMENTS

This project has received funding from the European Research Council (ERC) under the European Union's Horizon 2020 research and innovation programme under grant agreement No 740704.

## REFERENCES

1. **Scheffer M, Carpenter SR.** 2003. Catastrophic regime shifts in ecosystems: linking theory to observation. *Trends ecology & evolution* 18(12):648–656.
2. **Gonze D, Lahti L, Raes J, Faust K.** 2017 10. Multi-stability and the origin of microbial community types. *The ISME Journal* 11(10):2159–2166. <https://doi.org/10.1038/ismej.2017.60>.
3. **Wright ES, Vetsigian KH.** 2016 4. Inhibitory interactions promote frequent bistability among competing bacteria. *Nature Communications* 7:11274. <https://doi.org/10.1038/ncomms11274>.
4. **Dubinkina V, Fridman Y, Pandey P, Maslov S.** 2018. Alternative stable states in a model of microbial community limited by multiple essential nutrients. arXiv preprint arXiv:1810.04726 .
5. **Goyal A, Dubinkina V, Maslov S.** 2018. Multiple stable states in microbial communities explained by the stable marriage problem. *The ISME journal* 12(12):2823.
6. **Thingstad T, Lignell R.** 1997. Theoretical models for the control of bacterial growth rate, abundance, diversity and carbon demand. *Aquatic Microbial Ecology* 13(1):19–27.
7. **Thingstad TF.** 2000. Elements of a theory for the mechanisms controlling abundance, diversity, and biogeochemical role of lytic bacterial viruses in aquatic systems. *Limnol. Oceanogr.* 45:1320–1328.
8. **Gause GF.** 1932. Experimental studies on the struggle for existence: I. Mixed population of two species of yeast. *Journal experimental biology* 9(4):389–402.
9. **AM C.** 1960. Conditions for the existence of bacteriophage. *Evolution* 15:153–165.



Regime shifts in a phage-bacteria ecosystem

10. **Haerter JO, Mitarai N, Sneppen K.** 2014. Phage and bacteria support mutual diversity in a narrowing staircase of coexistence. *The ISME journal* 8(11):2317.
11. **Hsu BB, Gibson TE, Yeliseyev V, Liu Q, Lyon L, Bry L, Silver PA, Gerber GK.** 2019. Dynamic Modulation of the Gut Microbiota and Metabolome by Bacteriophages in a Mouse Model. *Cell Host Microbe* <https://doi.org/10.1016/j.chom.2019.05.001>.
12. **Angulo MT, Moog CH, Liu YY.** 2019. A theoretical framework for controlling complex microbial communities. *Nature communications* 10.
13. **Chopin MC, Chopin A, Bidnenko E.** 2005. Phage abortive infection in lactococci: variations on a theme. *Current Opinion Microbiology* 8.
14. **Tilman D.** 1982. Resource competition and community structure. Princeton university press.
15. **Pfeiffer T, Schuster S, Bonhoeffer S.** 2001. Cooperation and Competition in the Evolution of ATP-Producing Pathways. *Science* 292(5516):504–507.
16. **Haerter JO, Mitarai N, Sneppen K.** 2016. Food web assembly rules for generalized Lotka-Volterra equations. *PLoS computational biology* 12(2):e1004727.
17. **Haerter JO, Mitarai N, Sneppen K.** 2017. Existence and construction of large stable food webs. *Physical Review E* 96(3):032406.
18. **Goh B.** 1977. Global Stability in Many-Species Systems. *The American Naturalist* 111:135–143.
19. **Lindeman RL.** 1942. The trophic-dynamic aspect of ecology. *Ecology* 23(4):399–417.
20. **Colinvaux P, Barnett B.** 1979. Lindeman and the ecological efficiency of wolves. *The American Naturalist* 114(5):707–718.
21. **Weitz JS, Dushoff J.** 2008. Alternative stable states in host–phage dynamics. *Theoretical Ecology* 1(1):13–19.
22. **Herskowitz I, Hagen D.** 1980. The lysis-lysogeny decision of phage lambda: explicit programming and responsiveness. *Annual review genetics* 14(1):399–445.
23. **Toman Z, Dambly-Chaudière C, Tenenbaum L, Radman M.** 1985. A system for detection of genetic and epigenetic alterations in *Escherichia coli* induced by DNA-damaging agents. *Journal Molecular Biology* 186:97–105.
24. **Reichardt L, Kaiser AD.** 1971. Control of  $\lambda$  Repressor Synthesis. *Proc Natl Acad Sci USA* 68:2185–2189.
25. **Eisen H, Brachet P, da Silva LP, Jacob F.** 1970. Regulation of Repressor Expression in  $\lambda$ . *Proc. Natl Acad. Sci. USA* 66:855–862.
26. **Kourilsky P.** 1973. Lysogenization by bacteriophage lambda. *Molecular General Genetics* 122(2):183–195.
27. **Deveau H, Barrangou R, Garneau J, Labonté J, Fremaux C, Boyaval P, Romero D, Horvath P, Moineau S.** 2007. Phage Response to CRISPR-Encoded Resistance in *Streptococcus thermophilus*. *J Bacteriol* 190(4):1390–1400.
28. **Strotskaya A, Savitskaya E, Metlitskaya A, Morozova N, Datsenko KA, Semenova E, Severinov K.** 2017. The action of *Escherichia coli* CRISPR–Cas system on lytic bacteriophages with different lifestyles and development strategies. *Nucleic Acids Research* 45(4):1946–1957. <https://doi.org/10.1093/nar/gkx042>.
29. **Watson BN, Vercoe RB, Salmond GP, Westra ER, Staals RH, Fineran PC.** 2019. Type I-F CRISPR-Cas resistance against virulent phage infection triggers abortive infection and provides population-level immunity. *bioRxiv* p. 679308.
30. **Bohannan BJ, Lenski RE.** 2000. The relative importance of competition and predation varies with productivity in a model community. *The American Naturalist* 156(4):329–340.
31. **Labrie SJ, Samson JE, Moineau S.** 2010. Bacteriophage resistance mechanisms. *Nature Reviews Microbiology* 8:317.
32. **Levin BR, Stewart FM, Chao L.** 1977. Resource-Limited Growth, Competition, and Predation: A Model and Experimental Studies with Bacteria and Bacteriophage. *The American Naturalist* 111:3–24.
